# Supplementary material for: Completeness and quality of low back pain prevalence data in the Global Burden of Disease Study 2017
Source: PubMed Central journal article supplement — BMJ Glob Health. 2021 May 17;6(5):e005847. doi: 10.1136/bmjgh-2021-005847 (PMC8130740; doi:10.1136/bmjgh-2021-005847), 2021-05-17
Supplement: bmjgh-2021-005847supp001.pdf [file bmjgh-2021-005847supp001.pdf]

## **Appendix 1. Operational definitions for representative sample and acceptable measure of LBP**

Representative sample: Code ‘Yes’ if it fulfils any of the six definitions below:

*1. Representative sub-national sample-all ages*

A report collects data from a part of a country like a state, city, town, village etc AND the sampling method is a census of all residents or a random sample.

*2. Representative sub-national sample-specific age group*

A report collects data from a part of a country like a state, city, town, village etc AND the sampling method is a census of all residents or a random sample of a specific age group.

*3. Representative national sample-all ages*

A report collects data from a whole country AND the sampling method is a census of all residents or a random sample.

*4. Representative national sample-specific age group*

A report collects data from a whole country AND the sampling method is a census of all residents or a random sample of a specific age group.

*5. Representative global region sample-all ages*

A report collects data from a whole global region AND the sampling method is a census of all residents or a random sample.

*6. Representative global region sample-specific age groups*

A report collects data from a whole global region AND the sampling method is a census of all residents or a random sample of a specific age group.

An acceptable measure of LBP: Code ‘Yes’ if it fulfils the definition below:

A visual (e.g. body chart/map) or verbal depiction of the low back region AND an acceptable measure of an episode of LBP.

An episode of pain OR activity-limiting pain is both acceptable. However, an episode of care-seeking for LBP is not acceptable as only half the people with LBP seek care and that approach will under-estimate the prevalence of LBP. For similar reasons an episode of LBP causing work absence is not acceptable as the majority of people with LBP remain at work.<sup>9</sup>

**Appendix 2. The 11 reports that we could not locate**

| <b>Citations</b>                                                                                                                                                                                                                                                              |
|-------------------------------------------------------------------------------------------------------------------------------------------------------------------------------------------------------------------------------------------------------------------------------|
| Ministry of Health and Welfare (Taiwan). Taiwan National Health Insurance Claims Data 2016.                                                                                                                                                                                   |
| Truven Health Analytics. United States MarketScan Claims and Medicare Data - 2000. Ann Arbor, United States: Truven Health Analytics.                                                                                                                                         |
| Truven Health Analytics. United States MarketScan Claims and Medicare Data - 2010. Ann Arbor, United States: Truven Health Analytics.                                                                                                                                         |
| Truven Health Analytics. United States MarketScan Claims and Medicare Data 2011. Ann Arbor, United States: Truven Health Analytics.                                                                                                                                           |
| Truven Health Analytics. United States MarketScan Claims and Medicare Data - 2012. Ann Arbor, United States: Truven Health Analytics.                                                                                                                                         |
| Truven Health Analytics. United States MarketScan Claims and Medicare Data 2013. Ann Arbor, United States: Truven Health Analytics.                                                                                                                                           |
| Truven Health Analytics. United States MarketScan Claims and Medicare Data 2014. Ann Arbor, United States: Truven Health Analytics.                                                                                                                                           |
| Federal Environment Agency (Germany), Federal Institute for Drugs and Medical Devices (Germany), Max Planck Institute of Psychiatry, Robert Koch Institute. Germany National Health Interview and Examination Survey 1997-1999. Berlin, Germany: Robert Koch Institute, 2000. |
| Indian Council of Medical Research (ICMR), Ministry of Health and Family Welfare (India), Vardhman Mahavir Medical College and Safdarjung Hospital (India). India Survey on Musculoskeletal Conditions 2007-2010.                                                             |
| Central Administration of Statistics (Lebanon), League of Arab States, Ministry of Social Affairs (Lebanon), Pan Arab Project for Family Health (PAPFAM). Lebanon Family Health Survey 2004.                                                                                  |
| Malek J, Prikazsk V, Kurziva A, Kozak J, Lengalova E. Prevalence of pain in the Czech Republic – A pilot study. <i>Bolest</i> . 2003; 6(2): 113-22.                                                                                                                           |

**Appendix 3. Number of prevalence reports for the 25 most burdensome health conditions in the GBD 2019 study (judged by DALYs).**

| <b>Condition</b>               | <b>Prevalence Reports</b> |
|--------------------------------|---------------------------|
| 1. Neonatal disorders          | 1345                      |
| 2 Ischaemic heart disease      | 259                       |
| 3 Stroke                       | 429                       |
| 4 Lower respiratory infections | 940                       |
| 5 Diarrhoeal diseases          | 1702                      |
| 6 COPD                         | 158                       |
| 7 Road injuries                | 188                       |
| 8 Diabetes                     | 1280                      |
| 9 Low back pain                | 455                       |
| 10 Congenital birth defects    | 1270                      |
| 11 HIV/AIDS                    | 1238                      |
| 12 Tuberculosis                | 268                       |
| 13 Depressive disorders        | 528                       |
| 14 Malaria                     | 2644                      |
| 15 Headache disorders          | 151                       |
| 16 Cirrhosis                   | 261                       |
| 17 Lung cancer                 | 474                       |
| 18 Chronic kidney disease      | 909                       |
| 19 Other musculoskeletal       | 59                        |
| 20 Age-related hearing loss    | 58                        |
| 21 Falls                       | 124                       |
| 22 Self-harm                   | 107                       |
| 23 Gynaecological diseases     | 547                       |
| 24 Anxiety disorders           | 197                       |
| 25 Dietary iron deficiency     | 19                        |

List of conditions obtained from GBD 2019 study; number of prevalence reports obtained from Global Burden of Disease Study 2019 (GBD 2019) Data Input Sources Tool

<http://ghdx.healthdata.org/gbd-2019/data-input-sources>

Search terms: Components = 'Nonfatal Health Outcomes'; Locations = 'Global', Causes = conditions listed above searched sequentially ie 25 searches
